# Supplementary material for: Paternal DNA Methylation May Be Associated With Gestational Age at Birth
Source: PubMed Central journal article supplement — Epigenet Insights. 2020 Sep 10;13:2516865720930701. doi: 10.1177/2516865720930701 (PMC7488897; doi:10.1177/2516865720930701), 2020-09-10
Supplement: Supplementary_Tables_S1-S4.pdf [file Supplementary_Tables_S1-S4.pdf]

**Additional file1: Table S1** List of 216 CpG sites and characteristics that were significantly associated with gestational age at birth

| CpG        | Selection Probability | p-value   | CHR | Mapinfo   | Annotated Genes                                       | CpG location relative to gene | Relation to CpG island |
|------------|-----------------------|-----------|-----|-----------|-------------------------------------------------------|-------------------------------|------------------------|
| cg03564730 | 83                    | 1.57E-05  | 2   | 310099    | <i>ALKAL2;</i><br><i>ACP1;</i><br><i>SH3YL1</i>       |                               | S_Shore                |
| cg01195858 | 82                    | 0.0002997 | 20  | 42839569  | <i>C20orf111</i>                                      | TSS200                        | Island                 |
| cg20118857 | 81                    | 5.15E-07  | 17  | 48228624  | <i>PPP1R9B</i>                                        | TSS1500                       | Island                 |
| cg02733604 | 80                    | 7.44E-05  | 7   | 569418    | <i>PDGFA;</i><br><i>PRKAR1B;</i><br><i>FLJ44511</i>   |                               | N_Shore                |
| cg17966227 | 79                    | 4.64E-06  | 1   | 113738233 | <i>LRIG2;</i><br><i>MAGI3;</i><br><i>SLC16A</i>       |                               | N_Shelf                |
| cg19102771 | 79                    | 2.95E-05  | 2   | 223166909 | <i>CCDC140</i>                                        | 5'UTR                         | N_Shore                |
| cg11408933 | 78                    | 1.72E-05  | 5   | 141191429 | <i>PCDH1;</i><br><i>LOC719080;</i><br><i>BC127870</i> |                               |                        |
| cg14341558 | 78                    | 8.73E-06  | 20  | 46131144  | <i>NCOA3</i>                                          | 5'UTR                         | S_Shore                |
| cg06155606 | 77                    | 0.0002644 | 11  | 6704862   | <i>MRPL17</i>                                         | TSS1500                       | Island                 |
| cg16250330 | 77                    | 4.26E-05  | 1   | 184943561 | <i>FAM129A</i>                                        | 1stExon;<br>5'UTR             | Island                 |
| cg22911867 | 77                    | 0.0001613 | 11  | 126173548 | <i>DCPS</i>                                           | TSS200                        | Island                 |
| cg01740172 | 76                    | 1.33E-05  | 3   | 18485840  | <i>SATB1</i>                                          |                               | Island                 |
| cg18018245 | 76                    | 0.0001234 | 1   | 167906535 | <i>BRP44;</i><br><i>DCAF6</i>                         | TSS1500;<br>Body              | Island                 |
| cg13153394 | 75                    | 2.09E-05  | 3   | 45209196  | <i>CDCP1;</i><br><i>TMEM158</i>                       |                               |                        |
| cg01432087 | 74                    | 0.0001164 | 11  | 67242162  | <i>TMEM134;</i><br><i>AIP</i>                         |                               |                        |
| cg05147765 | 74                    | 6.19E-05  | 17  | 66555864  | <i>FAM20A</i>                                         | Body;<br>TSS1500              |                        |
| cg02827082 | 72                    | 3.87E-05  | 18  | 7012277   | <i>LAMA1</i>                                          | Body                          | S_Shore                |

|            |    |           |    |           |                                                                                          |                               |  |         |
|------------|----|-----------|----|-----------|------------------------------------------------------------------------------------------|-------------------------------|--|---------|
| cg04699462 | 71 | 0.0004236 | 7  | 101328918 | <i>MYL10;</i><br><i>COL26A1;</i><br><i>CUX1</i>                                          |                               |  | N_Shelf |
| cg08706837 | 71 | 1.12E-05  | 1  | 37940090  | <i>ZC3H12A</i>                                                                           | TSS200                        |  | Island  |
| cg26282283 | 71 | 7.68E-05  | 7  | 2704368   | <i>TTYH3</i>                                                                             | 3'UTR                         |  | S_Shelf |
| cg27431625 | 71 | 9.62E-05  | 2  | 107679531 | <i>ST6GAL2</i>                                                                           |                               |  |         |
| cg02698622 | 70 | 4.40E-05  | 2  | 242698811 | <i>D2HGDH</i>                                                                            | Body                          |  |         |
| cg04391722 | 70 | 6.76E-05  | 8  | 81397601  | <i>ZBTB10</i>                                                                            | TSS1500                       |  | N_Shore |
| cg04829993 | 70 | 0.0001496 | 10 | 71561459  | <i>COL13A1</i>                                                                           | TSS200                        |  | Island  |
| cg08418172 | 70 | 0.0001391 | 19 | 55791495  | <i>HSPBP1</i>                                                                            | 5'UTR;<br>1stExon             |  | Island  |
| cg13548607 | 70 | 7.55E-05  | 12 | 91396741  | <i>EPYC</i>                                                                              | 5'UTR                         |  |         |
| cg18088494 | 70 | 0.0001289 | 1  | 16494143  | <i>EPHA2;</i><br><i>ARHGEF19</i>                                                         |                               |  | Island  |
| cg00991871 | 69 | 0.0001335 | 1  | 214358938 | <i>SMYD2;</i><br><i>PROX1;</i><br><i>PTPN14</i>                                          |                               |  | N_Shore |
| cg05628381 | 69 | 0.0001386 | 19 | 982985    | <i>WDR18</i>                                                                             | TSS1500                       |  | Island  |
| cg14795268 | 69 | 0.0001217 | 1  | 1341852   | <i>MRPL20</i>                                                                            | Body                          |  | N_Shore |
| cg25388264 | 69 | 6.85E-05  | 5  | 1168528   | <i>BC032469;</i><br><i>SLC6A19;</i><br><i>SLC12A7;</i><br><i>SLC6A18;</i><br><i>TERT</i> |                               |  | N_Shelf |
| cg07813142 | 68 | 9.16E-05  | 2  | 171573223 | <i>SP5</i>                                                                               | Body                          |  | Island  |
| cg15664075 | 68 | 0.0002314 | 19 | 11456960  | <i>CCDC159;</i><br><i>TMEM205</i>                                                        | TSS1500;<br>5'UTR;<br>1stExon |  | Island  |
| cg27109657 | 68 | 0.0001124 | 16 | 86909402  | <i>AK125749;</i><br><i>BC041439</i>                                                      |                               |  | N_Shelf |
| cg03948415 | 67 | 6.30E-05  | 12 | 54718738  | <i>COPZ1</i>                                                                             | TSS200                        |  |         |
| cg05081629 | 67 | 0.0001833 | 8  | 100906015 | <i>COX6C</i>                                                                             | TSS200                        |  | S_Shore |

|            |    |           |    |           |                                        |                    |         |
|------------|----|-----------|----|-----------|----------------------------------------|--------------------|---------|
| cg06690899 | 67 | 4.69E-05  | 11 | 6285281   | <i>CCKBR</i>                           | Body               | S_Shelf |
| cg09154794 | 67 | 0.0004376 | 1  | 28239160  | <i>RPA2</i>                            | Body               | N_Shore |
| cg13013671 | 67 | 4.32E-05  | 5  | 114632084 | <i>CCDC112</i>                         | Body;<br>TSS200    | Island  |
| cg13315970 | 67 | 0.0002774 | 6  | 86159197  | <i>NT5E</i>                            | TSS200             | N_Shore |
| cg14218275 | 67 | 2.78E-05  | 10 | 11047435  | <i>CUGBP2</i>                          | Body               |         |
| cg24738650 | 67 | 3.01E-05  | 1  | 113465464 | <i>AFARP1;<br/>SLC16A1</i>             | TSS1500;<br>Body   |         |
| cg24918705 | 67 | 0.0002123 | 5  | 140501321 | <i>PCDHB4</i>                          | TSS1500            | N_Shore |
| cg26627405 | 67 | 0.000212  | 10 | 112104964 | <i>SMNDC1;<br/>MXI1; DUSP5</i>         |                    |         |
| cg02902477 | 66 | 0.0006042 | 6  | 26197071  | <i>HIST1H3D</i>                        | Body               | Island  |
| cg03593076 | 66 | 2.02E-05  | 18 | 55866456  | <i>NEDD4L</i>                          | 5'UTR;<br>Body     | S_Shelf |
| cg07148818 | 66 | 0.0001527 | 17 | 8028835   | <i>HES7</i>                            | TSS1500            | Island  |
| cg15000794 | 66 | 0.0002513 | 7  | 86849844  | <i>C7orf23</i>                         | TSS1500            | Island  |
| cg16434546 | 66 | 0.000628  | 5  | 64063849  | <i>SFRS12IP1;<br/>SDCCAG10</i>         | Body;<br>TSS1500   | N_Shore |
| cg19508967 | 66 | 0.0003228 | 5  | 1840347   | <i>NDUFS6;<br/>IRX4;<br/>MRPL36</i>    |                    |         |
| cg25024993 | 66 | 0.0001504 | 5  | 140248610 | <i>PCDHA7;<br/>PCDHA6;<br/>PCDHA11</i> | Body;<br>1stExon   | N_Shore |
| cg27602786 | 66 | 0.0002672 | 16 | 30934666  | <i>NCRNA00095;<br/>FBXL19</i>          | TSS200;<br>TSS1500 | Island  |
| cg00955096 | 65 | 0.0002403 | 6  | 125475363 | <i>TPD52L1</i>                         | Body;<br>TSS200    | Island  |
| cg12814529 | 65 | 0.0003409 | 12 | 103890083 | <i>C12orf42</i>                        | TSS1500            | S_Shore |

|            |    |           |    |           |                                                          |                   |         |
|------------|----|-----------|----|-----------|----------------------------------------------------------|-------------------|---------|
| cg18753664 | 65 | 0.000238  | 12 | 124515061 | <i>ZNF664;</i><br><i>CCDC92;</i><br><i>DNAH10</i>        |                   |         |
| cg19882663 | 65 | 0.0001381 | 3  | 180308459 | <i>TTC14;</i><br><i>CCDC39</i>                           |                   |         |
| cg21851142 | 65 | 0.0001891 | 6  | 132129008 | <i>ENPP1</i>                                             | TSS200            | Island  |
| cg23992410 | 65 | 0.0002046 | 1  | 214160848 | <i>PROX1</i>                                             | TSS1500           | Island  |
| cg07615781 | 64 | 0.0002507 | 11 | 71350888  | <i>FAM86C1;</i><br><i>KRTAP5-11;</i><br><i>KRTAP5-10</i> |                   | Island  |
| cg09553448 | 64 | 0.0003427 | 9  | 134000424 | <i>NUP214</i>                                            | TSS1500           | N_Shore |
| cg10454162 | 64 | 0.0001126 | 3  | 113955940 | <i>ZNF80</i>                                             | 5'UTR;<br>1stExon |         |
| cg19718882 | 64 | 0.0003895 | 11 | 32458714  | <i>WIT1</i>                                              | Body              | N_Shore |
| cg24389632 | 64 | 7.46E-05  | 10 | 38146246  | <i>ZNF248</i>                                            | 5'UTR;<br>1stExon | N_Shore |
| cg26892368 | 64 | 0.0004097 | 10 | 97416665  | <i>ALDH18A1</i>                                          | TSS200            | Island  |
| cg06308084 | 63 | 0.0006912 | 22 | 50493570  | <i>TTLL8</i>                                             | TSS1500           | N_Shelf |
| cg08792584 | 63 | 0.0002955 | 11 | 43899178  | <i>ALKBH3;</i><br><i>HSD17B12</i>                        |                   | N_Shelf |
| cg11523059 | 63 | 0.0001731 | 6  | 46921096  | <i>GPR116</i>                                            | 5'UTR             |         |
| cg12794421 | 63 | 0.0002839 | 8  | 19171191  | <i>SH2D4A</i>                                            | TSS200            | Island  |
| cg16505550 | 63 | 0.0002262 | 1  | 57045708  | <i>PPAP2B</i>                                            | TSS1500           | S_Shore |
| cg17120366 | 63 | 0.0002029 | 10 | 28571322  | <i>MPP7</i>                                              | TSS1500           |         |
| cg21497602 | 63 | 0.0002786 | 12 | 12715811  | <i>DUSP16</i>                                            | TSS1500           | S_Shore |
| cg25965499 | 63 | 0.0006054 | 19 | 1885691   | <i>FAM108A1</i>                                          | TSS200            | S_Shore |
| cg10220068 | 62 | 0.0002956 | 5  | 179770007 | <i>GFPT2</i>                                             | Body              |         |
| cg11454936 | 62 | 0.0002332 | 6  | 167184995 | <i>RPS6KA2</i>                                           | Body              |         |
| cg14537800 | 62 | 4.45E-05  | 4  | 15964950  | <i>FGFBP2</i>                                            | TSS200            |         |

|            |    |           |    |           |                                                     |                    |         |
|------------|----|-----------|----|-----------|-----------------------------------------------------|--------------------|---------|
| cg15630459 | 62 | 0.0001165 | 5  | 175223225 | <i>CPLX2</i>                                        | TSS1500            | N_Shore |
| cg15664909 | 62 | 0.0003183 | 17 | 685709    | <i>GLOD4;<br/>RNMTL1</i>                            | TSS200;<br>1stExon | Island  |
| cg18314121 | 62 | 9.11E-05  | 1  | 225726360 | <i>ENAH</i>                                         | Body               |         |
| cg27597392 | 62 | 4.42E-05  | 12 | 12753718  | <i>CREBL2;<br/>DUSP16</i>                           |                    |         |
| cg00911376 | 61 | 0.0005774 | 16 | 84274417  | <i>KCNG4</i>                                        | TSS1500            | S_Shelf |
| cg01084379 | 61 | 0.0006116 | 5  | 179160712 | <i>MAML1</i>                                        | Body               | S_Shore |
| cg01900371 | 61 | 4.16E-05  | 2  | 27256120  | <i>TMEM214</i>                                      | Body               | Island  |
| cg11718315 | 61 | 0.0002811 | 15 | 65579480  | <i>PARP16</i>                                       | TSS1500            | Island  |
| cg15090899 | 61 | 0.0001347 | 6  | 167178260 | <i>RPS6KA2</i>                                      | Body               |         |
| cg16540921 | 61 | 0.0004033 | 16 | 86588494  | <i>MTHFSD</i>                                       | Body;<br>5'UTR     | Island  |
| cg17973394 | 61 | 0.0006905 | 15 | 25684267  | <i>UBE3A</i>                                        | TSS200             | Island  |
| cg07754138 | 60 | 0.0002435 | 22 | 46973496  | <i>CELSR1;<br/>GRAMD4;<br/>CERK</i>                 |                    | Island  |
| cg08199544 | 60 | 0.0006667 | 5  | 140418    | <i>PLEKHG4B</i>                                     | 5'UTR;<br>1stExon  |         |
| cg12851526 | 60 | 8.67E-05  | 7  | 100609034 | <i>MUC3A;<br/>AK057259;<br/>AK096803;<br/>MUC3B</i> |                    | Island  |
| cg18320379 | 60 | 0.0003056 | 11 | 75947361  | <i>WNT11;<br/>UVRAG;<br/>PRKRIR</i>                 |                    | Island  |
| cg18608017 | 60 | 0.0003267 | 10 | 73158072  | <i>CDH23</i>                                        | 5'UTR              | S_Shore |
| cg24323328 | 60 | 0.0002215 | 12 | 1099998   | <i>ERC1</i>                                         | TSS1500            | Island  |
| cg00118365 | 59 | 0.0003418 | 5  | 140779112 | <i>PCDHGA4;<br/>PCDHGB5;<br/>PCDHGA6</i>            | Body;<br>1stExon   | Island  |

|            |    |           |    |           |                                                      |                   |         |
|------------|----|-----------|----|-----------|------------------------------------------------------|-------------------|---------|
| cg00646621 | 59 | 0.0003368 | 2  | 235949598 | <i>SH3BP4</i>                                        | Body              | N_Shore |
| cg05194808 | 59 | 0.0001778 | 21 | 47405786  | <i>COL6A1</i>                                        | Body              | N_Shore |
| cg06715928 | 59 | 0.0004612 | 10 | 112257500 | <i>DUSP5</i>                                         | TSS200            | Island  |
| cg10744200 | 59 | 0.0003013 | 4  | 24844162  | <i>CCDC149</i>                                       | Body              |         |
| cg12392225 | 59 | 0.0005448 | 2  | 3464066   | <i>TTC15</i>                                         | Body              | S_Shelf |
| cg16637873 | 59 | 0.0004348 | 12 | 6982822   | <i>SPSB2</i>                                         | TSS1500           | Island  |
| cg16767964 | 59 | 0.0001994 | 14 | 21167096  | <i>RNASE4</i>                                        | 5'UTR             |         |
| cg18643199 | 59 | 0.0005881 | 10 | 82363313  | <i>SH2D4B</i>                                        | Body              |         |
| cg20547031 | 59 | 0.0006331 | 7  | 31381526  | <i>NEUROD6</i>                                       | TSS1500           |         |
| cg22745781 | 59 | 0.0002844 | 7  | 16461244  | <i>ISPD</i>                                          | TSS1500           | Island  |
| cg00783553 | 58 | 0.0004489 | 1  | 7023495   | <i>CAMTA1</i>                                        | Body              | S_Shore |
| cg05198596 | 58 | 0.0001313 | 12 | 113591127 | <i>CCDC42B</i>                                       | Body              | Island  |
| cg09960435 | 58 | 0.0003222 | 19 | 44323775  | <i>LYPD5</i>                                         | 5'UTR             | N_Shore |
| cg18317951 | 58 | 0.0003042 | 8  | 96145702  | <i>PLEKHF2</i>                                       | TSS1500           | N_Shore |
| cg20002523 | 58 | 0.000247  | 1  | 54665230  | <i>CYB5RL;</i><br><i>MRPL37</i>                      | 5'UTR;<br>TSS1500 | N_Shore |
| cg21752383 | 58 | 0.0004731 | 5  | 140739976 | <i>PCDHGA4;</i><br><i>PCDHGA2;</i><br><i>PCDHGB2</i> | Body;<br>1stExon  | N_Shore |
| cg22534374 | 58 | 0.0006553 | 1  | 201511610 | <i>RPS10P7;</i><br><i>CSRP1;</i><br><i>PHLDA3</i>    |                   | S_Shelf |
| cg25403084 | 58 | 0.0004747 | 7  | 6048832   | <i>PMS2;</i> <i>AIMP2</i>                            | TSS200            | Island  |
| cg05155578 | 57 | 0.0008234 | 6  | 88032202  | <i>GJB7;</i><br><i>C6orf162</i>                      | 5'UTR;<br>TSS200  | Island  |
| cg05645292 | 57 | 0.0004194 | 3  | 59795625  | <i>FHIT</i>                                          | Body              |         |
| cg16857548 | 57 | 0.0004433 | 18 | 3011965   | <i>LPIN2</i>                                         | TSS200            | N_Shore |
| cg17046855 | 57 | 0.0001871 | 7  | 6749638   | <i>ZNF12;</i><br><i>PMS2CL</i>                       |                   | S_Shelf |

|            |    |           |    |           |                                   |                   |         |
|------------|----|-----------|----|-----------|-----------------------------------|-------------------|---------|
| cg18454916 | 57 | 0.0004311 | 8  | 74005562  | <i>C8orf84</i>                    | TSS200            | Island  |
| cg20413202 | 57 | 0.000616  | 1  | 10056853  | <i>RBP7</i>                       | TSS1500           | N_Shore |
| cg21470142 | 57 | 0.0003724 | 8  | 41732895  | <i>ANK1</i>                       | Body              | N_Shore |
| cg21605452 | 57 | 0.0012944 | 3  | 176915282 | <i>TBL1XR1</i>                    | TSS1500           | N_Shore |
| cg24693982 | 57 | 0.0004843 | 6  | 144508735 | <i>STX11</i>                      | 3'UTR             | S_Shore |
| cg00107629 | 56 | 0.0005711 | 11 | 46389307  | <i>DGKZ</i>                       | Body              | Island  |
| cg00480331 | 56 | 0.0010039 | 3  | 187455371 | <i>BCL6</i>                       | 5'UTR;<br>TSS1500 | Island  |
| cg03193847 | 56 | 0.000856  | 4  | 169637496 | <i>PALLD</i>                      | Body              |         |
| cg05180182 | 56 | 0.0003354 | 10 | 3666755   | <i>KLF6</i>                       |                   |         |
| cg05185021 | 56 | 0.000591  | 17 | 2324794   | <i>METT10D</i>                    | Body              |         |
| cg05817664 | 56 | 0.0005699 | 1  | 212731921 | <i>ATF3;<br/>FAM71A;<br/>NENF</i> |                   | Island  |
| cg16255150 | 56 | 0.0001496 | 14 | 73924775  | <i>NUMB</i>                       | 5'UTR             | Island  |
| cg21680208 | 56 | 0.002076  | 12 | 82752713  | <i>CCDC59;<br/>C12orf26</i>       | TSS1500;<br>Body  | Island  |
| cg25538235 | 56 | 0.0002037 | 18 | 70211974  | <i>CBLN2</i>                      | TSS1500           | S_Shore |
| cg05838155 | 55 | 0.0003626 | 17 | 37557276  | <i>FBXL20</i>                     | Body              | N_Shore |
| cg06143663 | 55 | 0.0001909 | 16 | 11242115  | <i>CLEC16A</i>                    | Body              |         |
| cg09409311 | 55 | 0.0003184 | 19 | 45457933  | <i>CLPTM1</i>                     | TSS1500           | N_Shore |
| cg10492152 | 55 | 0.0017821 | 6  | 52051113  | <i>IL17A</i>                      | TSS200            |         |
| cg12116137 | 55 | 0.0003915 | 17 | 1576449   | <i>PRPF8</i>                      | Body              |         |
| cg13408347 | 55 | 0.000483  | 12 | 91347805  | <i>C12orf12</i>                   | 1stExon           | Island  |
| cg17192533 | 55 | 0.0004368 | 4  | 160408494 | <i>RAPGEF2</i>                    |                   |         |
| cg17353896 | 55 | 0.0005827 | 2  | 209116254 | <i>IDH1</i>                       | Body              | N_Shelf |
| cg17996591 | 55 | 0.0007001 | 3  | 88198870  | <i>C3orf38</i>                    | TSS200            | Island  |
| cg20781212 | 55 | 0.0011189 | 22 | 35653362  | <i>HMGXB4</i>                     | TSS200            | Island  |
| cg22242857 | 55 | 0.0010964 | 18 | 76751952  | <i>SALL3</i>                      | Body              | Island  |
| cg27475652 | 55 | 0.0006154 | 8  | 24774727  | <i>NEFM</i>                       | Body              | S_Shelf |
| cg01477015 | 54 | 0.000599  | 16 | 28948319  | <i>CD19</i>                       | Body              | Island  |

|            |    |           |    |           |                                                       |                               |         |
|------------|----|-----------|----|-----------|-------------------------------------------------------|-------------------------------|---------|
| cg01547733 | 54 | 0.0005774 | 6  | 153304507 | <i>FBXO5</i>                                          | 1stExon;<br>5'UTR;<br>TSS1500 | Island  |
| cg02337277 | 54 | 0.0004764 | 6  | 52795627  | <i>GSTA3;<br/>GSTA4</i>                               |                               |         |
| cg04214430 | 54 | 0.0026281 | 13 | 50702707  | <i>DLEU1;<br/>DLEU2</i>                               |                               | N_Shore |
| cg04630171 | 54 | 0.0003781 | 12 | 121735002 | <i>CAMKK2</i>                                         | 5'UTR                         | Island  |
| cg05277991 | 54 | 0.0005186 | 3  | 69788295  | <i>MITF</i>                                           | TSS1500                       | N_Shore |
| cg07838205 | 54 | 0.0002758 | 1  | 110091179 | <i>GNAI3</i>                                          | TSS200                        | Island  |
| cg08706141 | 54 | 0.0006592 | 22 | 20073403  | <i>MIR1306;<br/>DGCR8</i>                             | TSS200;<br>5'UTR              | Island  |
| cg11004797 | 54 | 0.000431  | 5  | 61699868  | <i>DIMT1L</i>                                         | TSS200                        | Island  |
| cg11190156 | 54 | 0.0003755 | 6  | 26104118  | <i>HIST1H4C</i>                                       | TSS200                        | N_Shore |
| cg13396152 | 54 | 0.0004113 | 1  | 62005072  | <i>NFIA; TM2D1;<br/>PATJ</i>                          |                               |         |
| cg14642395 | 54 | 0.0003853 | 11 | 64322079  | <i>SLC22A11</i>                                       | TSS1500                       |         |
| cg15041373 | 54 | 0.0008182 | 19 | 39577941  | <i>PAPL</i>                                           | Body                          | S_Shelf |
| cg15608402 | 54 | 0.0002754 | 11 | 3122933   | <i>OSBPL5</i>                                         | Body                          |         |
| cg19504782 | 54 | 0.000245  | 11 | 2886232   | <i>KCNQ1DN;<br/>KCNQ1;<br/>CDKN1C;<br/>SLC22A18AS</i> |                               | S_Shore |
| cg22909759 | 54 | 0.0002247 | 14 | 65185328  | <i>PLEKHG3</i>                                        | 5'UTR                         |         |
| cg23081534 | 54 | 0.0005247 | 3  | 169540079 | <i>LRRIQ4</i>                                         | 1stExon                       |         |
| cg27558564 | 54 | 0.0001575 | 3  | 194325087 | <i>TMEM44</i>                                         | Body                          |         |
| cg03200309 | 53 | 0.0006641 | 12 | 48722990  | <i>H1FNT</i>                                          | 5'UTR;<br>1stExon             | N_Shore |
| cg05150023 | 53 | 0.001313  | 5  | 42944267  | <i>SEPP1;<br/>AK056817;<br/>LOC648987</i>             |                               | Island  |



|            |    |           |    |           |                                                     |                              |         |
|------------|----|-----------|----|-----------|-----------------------------------------------------|------------------------------|---------|
| cg06823965 | 53 | 0.0005732 | 7  | 101632645 | <i>CUX1</i>                                         | Body                         |         |
| cg12150994 | 53 | 0.0006513 | 8  | 2130263   | <i>MYOM2;</i><br><i>KBTBD11;</i><br><i>ARHGEF10</i> |                              | Island  |
| cg12878710 | 53 | 0.0012054 | 3  | 197517984 | <i>LRCH3</i>                                        | TSS200                       | Island  |
| cg13954965 | 53 | 0.000952  | 2  | 133175192 | <i>GPR39</i>                                        | 1stExon                      | Island  |
| cg14495916 | 53 | 0.0010237 | 3  | 171800301 | <i>FNDC3B</i>                                       | 5'UTR                        |         |
| cg19353425 | 53 | 0.0004908 | 2  | 69968558  | <i>ANXA4</i>                                        | TSS1500                      | N_Shore |
| cg19547547 | 53 | 0.0009293 | 5  | 140166059 | <i>PCDHA1</i>                                       | 1stExon                      | Island  |
| cg19840226 | 53 | 0.0003743 | 15 | 78369626  | <i>TBC1D2B</i>                                      | Body                         | Island  |
| cg21016177 | 53 | 0.0001445 | 17 | 74100207  | <i>EXOC7</i>                                        | TSS1500                      | S_Shore |
| cg25803423 | 53 | 0.0009276 | 14 | 23563820  | <i>C14orf119;</i><br><i>ACIN1</i>                   | TSS1500;<br>Body             | N_Shore |
| cg27139077 | 53 | 0.0006516 | 15 | 43622721  | <i>ADAL;</i> <i>LCMT2</i>                           | TSS200;<br>5'UTR;<br>1stExon | Island  |
| cg00307497 | 52 | 0.0005601 | 2  | 207976271 | <i>KLF7</i>                                         | Body                         |         |
| cg01025774 | 52 | 0.0014409 | 5  | 42944457  | <i>CCDC30</i>                                       |                              | Island  |
| cg01814364 | 52 | 0.000246  | 19 | 15285108  | <i>NOTCH3</i>                                       | Body                         | Island  |
| cg03068843 | 52 | 0.0009537 | 8  | 12985953  | <i>DLC1</i>                                         | Body                         | N_Shelf |
| cg03551406 | 52 | 0.0005365 | 16 | 56715756  | <i>MT1X</i>                                         | TSS1500                      | N_Shore |
| cg07934026 | 52 | 0.0012898 | 4  | 467794    | <i>ZNF721;</i><br><i>ABCA11P</i>                    | 5'UTR;<br>Body               | Island  |
| cg09095914 | 52 | 0.0006478 | 4  | 649881    | <i>PDE6B</i>                                        | Body                         | N_Shore |
| cg09204302 | 52 | 0.0004042 | 16 | 70713462  | <i>MTSS1L</i>                                       | Body                         | Island  |
| cg09601629 | 52 | 0.0009597 | 19 | 15122224  | <i>CCDC105</i>                                      | Body                         | S_Shore |
| cg09680131 | 52 | 0.0003448 | 13 | 111100754 | <i>COL4A2</i>                                       | Body                         |         |
| cg09962807 | 52 | 0.0002956 | 8  | 70747337  | <i>SLCO5A1</i>                                      | TSS200                       | Island  |
| cg13214121 | 52 | 0.0014901 | 7  | 157549678 | <i>PTPRN2</i>                                       | Body                         | N_Shore |

|            |    |           |    |           |                                        |                               |         |
|------------|----|-----------|----|-----------|----------------------------------------|-------------------------------|---------|
| cg16593941 | 52 | 0.000796  | 16 | 89351893  | <i>ANKRD11</i>                         | Body                          | N_Shore |
| cg18887073 | 52 | 0.0010225 | 19 | 13001796  | <i>GCDH</i>                            | TSS200                        | N_Shore |
| cg19477247 | 52 | 0.0002365 | 3  | 113955994 | <i>ZNF80</i>                           | 5'UTR;<br>1stExon             |         |
| cg20145426 | 52 | 0.0007946 | 1  | 30179925  | <i>BC042538</i>                        |                               |         |
| cg22544231 | 52 | 0.0008891 | 12 | 132195441 | <i>SFRS8</i>                           | TSS200                        | Island  |
| cg22625548 | 52 | 0.001611  | 8  | 42698722  | <i>THAP1</i>                           | TSS1500                       | Island  |
| cg24644436 | 52 | 0.0009591 | 10 | 135202906 | <i>PAOX</i>                            | Body;<br>3'UTR                | N_Shore |
| cg25338902 | 52 | 0.0005156 | 3  | 15828883  | <i>ANKRD28</i>                         | Body                          |         |
| cg26167744 | 52 | 0.0003319 | 12 | 124068794 | <i>TMED2</i>                           | TSS1500                       | N_Shore |
| cg00712686 | 51 | 0.0011502 | 17 | 46102784  | <i>COPZ2;<br/>NFE2L1;<br/>CDK5RAP3</i> |                               | Island  |
| cg01190171 | 51 | 0.0011749 | 6  | 31126373  | <i>CCHCR1;<br/>TCF19</i>               | 1stExon;<br>TSS1500;<br>5'UTR | Island  |
| cg03566107 | 51 | 0.0002816 | 18 | 70211962  | <i>CBLN2</i>                           | TSS1500                       | S_Shore |
| cg06326971 | 51 | 0.0003866 | 16 | 57836692  | <i>KIFC3</i>                           | TSS1500                       | Island  |
| cg06996372 | 51 | 0.0008081 | 1  | 16271373  | <i>ZBTB17</i>                          | Body                          | Island  |
| cg11444704 | 51 | 0.0009176 | 5  | 159738916 | <i>CCNJL</i>                           | Body                          | Island  |
| cg12097080 | 51 | 0.0016491 | 14 | 88793139  | <i>KCNK10</i>                          | 1stExon;<br>5'UTR             | Island  |
| cg14834903 | 51 | 0.0004979 | 14 | 73712902  | <i>PAPLN</i>                           | Body                          | Island  |
| cg17366378 | 51 | 0.001068  | 15 | 45458906  | <i>SHF; DUOX1</i>                      |                               | Island  |
| cg17725364 | 51 | 0.0004795 | 2  | 238280514 | <i>COL6A3</i>                          | Body                          | Island  |
| cg20494553 | 51 | 0.0001616 | 4  | 71554112  | <i>UTP3</i>                            | TSS200                        | Island  |
| cg21275702 | 51 | 0.0003956 | 20 | 18269109  | <i>ZNF133</i>                          | TSS200                        | Island  |
| cg21336650 | 51 | 0.0004861 | 17 | 78161706  | <i>CARD14</i>                          | Body;<br>5'UTR;<br>1stExon    | N_Shelf |
| cg23234828 | 51 | 0.000867  | 14 | 55818341  | <i>FBXO34</i>                          | Body;<br>Body                 |         |
| cg24954670 | 51 | 0.0026624 | 3  | 50337092  | <i>HYAL3; NAT6</i>                     | TSS200;<br>TSS1500            | S_Shore |

|            |    |           |    |           |                    |                   |         |
|------------|----|-----------|----|-----------|--------------------|-------------------|---------|
| cg02539518 | 50 | 0.0008797 | 2  | 113915155 | <i>PSD4; IL1RN</i> |                   | Island  |
| cg02583334 | 50 | 0.0009703 | 3  | 180397599 | <i>CCDC39</i>      | TSS1500           | Island  |
| cg09728102 | 50 | 0.0004842 | 5  | 66124492  | <i>MAST4</i>       | TSS200;<br>Body   |         |
| cg14474582 | 50 | 0.0004689 | 5  | 176924578 | <i>PDLIM7</i>      | 1stExon;<br>5'UTR | Island  |
| cg22548000 | 50 | 0.0004356 | 2  | 32391035  | <i>SLC30A6</i>     | Body              | S_Shore |
| cg24797187 | 50 | 0.0008095 | 2  | 100175768 | <i>AFF3</i>        | Body              |         |
| cg24900963 | 50 | 0.0003984 | 16 | 28948266  | <i>CD19</i>        | Body              | Island  |
| cg25217428 | 50 | 0.0014714 | 1  | 168148809 | <i>TIPRL</i>       | Body              | S_Shore |

**Additional file1: Table S2** Description of the genes that appeared in the biological pathways

| GO: 0098742    |                                               | GO:0007156     |                                               |
|----------------|-----------------------------------------------|----------------|-----------------------------------------------|
| Gene Name      | Gene Symbol                                   | Gene Name      | Gene Symbol                                   |
| <i>CDH23</i>   | cadherin related 23                           | <i>CDH23</i>   | cadherin related 23                           |
| <i>PCDHGB5</i> | protocadherin gamma subfamily B, 5            | <i>PCDHGB5</i> | protocadherin gamma subfamily B, 5            |
| <i>PCDHGB2</i> | protocadherin gamma subfamily B, 2            | <i>PCDHGB2</i> | protocadherin gamma subfamily B, 2            |
| <i>PCDHGA6</i> | protocadherin gamma subfamily A, 6            | <i>PCDHGA6</i> | protocadherin gamma subfamily A, 6            |
| <i>PCDHGA4</i> | protocadherin gamma subfamily A, 4            | <i>PCDHGA4</i> | protocadherin gamma subfamily A, 4            |
| <i>PCDHGA2</i> | protocadherin gamma subfamily A, 2            | <i>PCDHGA2</i> | protocadherin gamma subfamily A, 2            |
| <i>PCDHB4</i>  | protocadherin beta 4                          | <i>PCDHB4</i>  | protocadherin beta 4                          |
| <i>PCDHA11</i> | protocadherin alpha 11                        | <i>PCDHA11</i> | protocadherin alpha 11                        |
| <i>PCDHA7</i>  | protocadherin alpha 7                         | <i>PCDHA7</i>  | protocadherin alpha 7                         |
| <i>PCDHA6</i>  | protocadherin alpha 6                         | <i>PCDHA6</i>  | protocadherin alpha 6                         |
| <i>PCDHA1</i>  | protocadherin alpha 1                         | <i>PCDHA1</i>  | protocadherin alpha 1                         |
| <i>CELSR1</i>  | cadherin EGF LAG seven-pass G-type receptor 1 | <i>CELSR1</i>  | cadherin EGF LAG seven-pass G-type receptor 1 |
| <i>PCDH1</i>   | protocadherin 1                               | <i>PCDH1</i>   | protocadherin 1                               |
| <i>IL1RN</i>   | interleukin 1 receptor antagonist             |                |                                               |

**A**

**Additional file1: Table S3** Correlation between DNA methylation levels of pathway-related CpGs and expression levels of annotated genes in offspring umbilical cord blood (IoWBC, n=132)

| Probe Name    | Annotated Gene  | CpG        | Spearman coefficient (n=132) | p-value |
|---------------|-----------------|------------|------------------------------|---------|
| A_23_P422044  | <i>PCDHGA2</i>  |            | 0.0026                       | 0.9760  |
| A_24_P334529  | <i>PCDHGA3</i>  |            | -0.1210                      | 0.1653  |
| A_33_P3395651 | <i>PCDHGA5</i>  |            | -0.0152                      | 0.8622  |
| A_24_P308851  | <i>PCDHGA7</i>  |            | 0.0005                       | 0.9954  |
| A_23_P390545  | <i>PCDHGA8</i>  |            | -0.0454                      | 0.6036  |
| A_23_P364414  | <i>PCDHGA9</i>  |            | -0.0844                      | 0.3344  |
| A_33_P3417611 | <i>PCDHGA12</i> |            | 0.0419                       | 0.6322  |
| A_23_P411772  | <i>PCDHGB1</i>  |            | -0.1014                      | 0.2454  |
| A_23_P395418  | <i>PCDHGB2</i>  | cg00118365 | -0.1081                      | 0.2154  |
| A_23_P359588  | <i>PCDHGB3</i>  |            | 0.0723                       | 0.4082  |
| A_23_P415470  | <i>PCDHGB4</i>  |            | -0.0453                      | 0.6045  |
| A_33_P3410981 | <i>PCDHGB6</i>  |            | -0.0496                      | 0.5710  |
| A_23_P218937  | <i>PCDHGB7</i>  |            | -0.0579                      | 0.5080  |
| A_33_P3422301 | <i>PCDHGC3</i>  |            | -0.0471                      | 0.5905  |
| A_32_P32856   | <i>PCDHGC4</i>  |            | -0.0515                      | 0.5563  |
| A_24_P34944   | <i>PCDHGC5</i>  |            | -0.0454                      | 0.6039  |
| A_33_P3246829 | <i>IL1RN</i>    | cg02539518 | -0.1346                      | 0.1224  |
| A_33_P3246833 | <i>IL1RN</i>    |            | -0.0460                      | 0.5995  |
| A_21_P0012311 | <i>CELSR1</i>   |            | -0.0523                      | 0.5497  |
| A_23_P132378  | <i>CELSR1</i>   |            | -0.1445                      | 0.0971  |
| A_33_P3328653 | <i>CELSR1</i>   | cg07754138 | -0.0109                      | 0.9013  |
| A_33_P3328659 | <i>CELSR1</i>   |            | -0.0688                      | 0.4311  |
| A_24_P234838  | <i>PCDH1</i>    | cg11408933 | -0.0604                      | 0.4901  |
| A_33_P3349637 | <i>PCDH1</i>    |            | 0.0854                       | 0.3284  |
| A_23_P217946  | <i>CDH23</i>    |            | -0.0224                      | 0.7982  |
| A_23_P307968  | <i>CDH23</i>    | cg18608017 | -0.0652                      | 0.4560  |
| A_23_P364437  | <i>CDH23</i>    |            | 0.1201                       | 0.1685  |
| A_33_P3403693 | <i>PCDHA1</i>   |            | 0.0225                       | 0.7968  |
| A_33_P3391846 | <i>PCDHA2</i>   |            | -0.0506                      | 0.5627  |
| A_33_P3332521 | <i>PCDHA3</i>   |            | -0.0291                      | 0.7398  |
| A_33_P3318002 | <i>PCDHA4</i>   |            | -0.0376                      | 0.6673  |
| A_33_P3258546 | <i>PCDHA5</i>   |            | -0.0279                      | 0.7498  |
| A_33_P3352867 | <i>PCDHA6</i>   | cg19547547 | -0.0112                      | 0.8986  |
| A_33_P3355608 | <i>PCDHA7</i>   |            | -0.0278                      | 0.7510  |
| A_33_P3250695 | <i>PCDHA8</i>   |            | -0.0684                      | 0.4340  |
| A_23_P323102  | <i>PCDHA9</i>   |            | -0.0592                      | 0.4984  |
| A_33_P3281299 | <i>PCDHA10</i>  |            | -0.0155                      | 0.8595  |
| A_24_P360206  | <i>PCDHA11</i>  |            | -0.0348                      | 0.6910  |

|                      |                       |                   |                |               |
|----------------------|-----------------------|-------------------|----------------|---------------|
| A_33_P3329274        | <i>PCDHA12</i>        |                   | 0.0269         | 0.7586        |
| A_33_P3210934        | <i>PCDHA13</i>        |                   | -0.0571        | 0.5141        |
| A_24_P191931         | <i>PCDHAC1</i>        |                   | 0.0299         | 0.7330        |
| A_23_P218942         | <i>PCDHAC2</i>        |                   | -0.0413        | 0.6374        |
| A_23_P422044         | <i>PCDHGA2</i>        |                   | -0.0470        | 0.5913        |
| A_24_P334529         | <i>PCDHGA3</i>        |                   | 0.0220         | 0.8012        |
| A_33_P3395650        | <i>PCDHGA5</i>        |                   | 0.0004         | 0.9601        |
| A_23_P435444         | <i>PCDHGA7</i>        |                   | -0.0849        | 0.3313        |
| A_23_P354734         | <i>PCDHGA8</i>        |                   | -0.1481        | 0.0890        |
| A_23_P364414         | <i>PCDHGA9</i>        |                   | -0.1319        | 0.1301        |
| A_24_P34944          | <i>PCDHGA12</i>       |                   | 0.0519         | 0.5528        |
| A_23_P310972         | <i>PCDHGB1</i>        | <b>cg21752383</b> | 0.0098         | 0.9105        |
| A_23_P411772         | <i>PCDHGB2</i>        |                   | 0.0170         | 0.8463        |
| A_23_P395418         | <i>PCDHGB3</i>        |                   | 0.0850         | 0.3309        |
| <b>A_23_P359588</b>  | <b><i>PCDHGB4</i></b> |                   | <b>0.2726</b>  | <b>0.0015</b> |
| A_23_P415470         | <i>PCDHGB6</i>        |                   | -0.0198        | 0.8214        |
| A_23_P370494         | <i>PCDHGB7</i>        |                   | 0.0325         | 0.7106        |
| A_23_P218937         | <i>PCDHGC3</i>        |                   | 0.0443         | 0.6124        |
| A_23_P303101         | <i>PCDHGC4</i>        |                   | 0.0617         | 0.4808        |
| A_32_P32856          | <i>PCDHGC5</i>        |                   | 0.0031         | 0.9722        |
| A_23_P81262          | <i>PCDHB4</i>         | cg24918705        | -0.0125        | 0.8869        |
| A_33_P3403693        | <i>PCDHA1</i>         |                   | -0.0303        | 0.7294        |
| A_33_P3391846        | <i>PCDHA2</i>         |                   | -0.0781        | 0.3715        |
| A_33_P3332521        | <i>PCDHA3</i>         |                   | -0.1406        | 0.1064        |
| <b>A_33_P3318002</b> | <b><i>PCDHA4</i></b>  |                   | <b>-0.2267</b> | <b>0.0087</b> |
| A_33_P3258546        | <i>PCDHA5</i>         |                   | -0.0687        | 0.4319        |
| A_33_P3352867        | <i>PCDHA6</i>         |                   | -0.0634        | 0.4686        |
| A_33_P3355608        | <i>PCDHA7</i>         |                   | 0.0263         | 0.7640        |
| A_33_P3250695        | <i>PCDHA8</i>         | <b>cg25024993</b> | -0.1179        | 0.1767        |
| A_23_P323102         | <i>PCDHA9</i>         |                   | -0.0706        | 0.4194        |
| A_33_P3281299        | <i>PCDHA10</i>        |                   | -0.0101        | 0.9084        |
| A_33_P3351904        | <i>PCDHA11</i>        |                   | -0.0923        | 0.2907        |
| A_33_P3329274        | <i>PCDHA12</i>        |                   | 0.0066         | 0.9395        |
| A_33_P3210934        | <i>PCDHA13</i>        |                   | -0.0975        | 0.2643        |
| A_24_P191931         | <i>PCDHAC1</i>        |                   | 0.0043         | 0.9611        |
| A_23_P218942         | <i>PCDHAC2</i>        |                   | -0.0878        | 0.3151        |

---

Note: Bolded mark represents significant correlation

**Additional file1: Table S4** Correlation between DNA methylation levels of pathway-related CpGs and expression levels of annotated genes in offspring umbilical cord blood (IoWBC, n=47)

| CpGs           | Annotated Gene  | Probe Name    | Spearman coefficient | p-value |
|----------------|-----------------|---------------|----------------------|---------|
| cg00118365     | <i>PCDHGA12</i> | A_24_P34944   | 0.0488               | 0.7446  |
|                | <i>PCDHGA2</i>  | A_23_P422044  | 0.0430               | 0.7740  |
|                | <i>PCDHGA3</i>  | A_24_P334529  | -0.0740              | 0.6210  |
|                | <i>PCDHGA5</i>  | A_33_P3395650 | -0.0599              | 0.6926  |
|                | <i>PCDHGA7</i>  | A_23_P435444  | 0.0451               | 0.7661  |
|                | <i>PCDHGA8</i>  | A_23_P354734  | -0.1987              | 0.1807  |
|                | <i>PCDHGA9</i>  | A_23_P364414  | -0.1763              | 0.2357  |
|                | <i>PCDHGB1</i>  | A_23_P310972  | 0.1969               | 0.1846  |
|                | <i>PCDHGB2</i>  | A_23_P411772  | -0.1482              | 0.3200  |
|                | <i>PCDHGB3</i>  | A_23_P395418  | -0.1805              | 0.2247  |
|                | <i>PCDHGB4</i>  | A_23_P359588  | 0.2479               | 0.0968  |
|                | <i>PCDHGB6</i>  | A_23_P415470  | -0.1822              | 0.2309  |
|                | <i>PCDHGB7</i>  | A_33_P3410981 | -0.0016              | 0.9914  |
|                | <i>PCDHGC3</i>  | A_23_P218937  | -0.0631              | 0.6733  |
|                | <i>PCDHGC4</i>  | A_33_P3422301 | -0.0623              | 0.6773  |
| <i>PCDHGC5</i> | A_32_P32856     | 0.0072        | 0.9619               |         |
| cg02539518     | <i>IL1RN</i>    | A_33_P3246833 | 0.0345               | 0.8181  |
|                | <i>IL1RN</i>    | A_33_P3246829 | -0.0636              | 0.6746  |
| cg07754138     | <i>CELSR1</i>   | A_33_P3328653 | -0.2306              | 0.1189  |
|                | <i>CELSR1</i>   | A_23_P132378  | -0.1649              | 0.2736  |
|                | <i>CELSR1</i>   | A_33_P3328659 | -0.0315              | 0.8338  |
| cg11408933     | <i>CELSR1</i>   | A_21_P0012311 | 0.0117               | 0.9379  |
|                | <i>PCDH1</i>    | A_24_P234838  | -0.1272              | 0.3995  |
|                | <i>PCDH1</i>    | A_33_P3349637 | 0.0576               | 0.7006  |
| cg18608017     | <i>CDH23</i>    | A_23_P307968  | -0.1460              | 0.3330  |
|                | <i>CDH23</i>    | A_23_P364437  | 0.2781               | 0.0584  |
|                | <i>CDH23</i>    | A_23_P217946  | -0.1708              | 0.2510  |
| cg19547547     | <i>PCDHA1</i>   | A_33_P3403693 | -0.0076              | 0.9594  |
|                | <i>PCDHA10</i>  | A_33_P3281299 | 0.0115               | 0.9394  |
|                | <i>PCDHA11</i>  | A_24_P360206  | 0.1515               | 0.3094  |
|                | <i>PCDHA12</i>  | A_33_P3329274 | 0.2201               | 0.1372  |
|                | <i>PCDHA13</i>  | A_33_P3210934 | -0.0392              | 0.7936  |
|                | <i>PCDHA2</i>   | A_33_P3391846 | 0.0223               | 0.8832  |
|                | <i>PCDHA3</i>   | A_33_P3332521 | -0.0564              | 0.7064  |
|                | <i>PCDHA4</i>   | A_33_P3318002 | -0.0554              | 0.7115  |
| <i>PCDHA5</i>  | A_33_P3258546   | 0.0505        | 0.7389               |         |
| <i>PCDHA6</i>  | A_33_P3352867   | 0.1323        | 0.3754               |         |
| <i>PCDHA7</i>  | A_33_P3355608   | -0.0931       | 0.5337               |         |
| <i>PCDHA8</i>  | A_33_P3250695   | -0.0559       | 0.7092               |         |

|            |                 |               |         |        |
|------------|-----------------|---------------|---------|--------|
|            | <i>PCDHA9</i>   | A_23_P323102  | 0.0828  | 0.5842 |
|            | <i>PCDHAC1</i>  | A_24_P191931  | 0.1362  | 0.3613 |
|            | <i>PCDHAC2</i>  | A_23_P218942  | -0.0538 | 0.7223 |
|            | <i>PCDHGA12</i> | A_24_P34944   | -0.1514 | 0.3098 |
|            | <i>PCDHGA2</i>  | A_23_P422044  | -0.1736 | 0.2433 |
|            | <i>PCDHGA3</i>  | A_24_P334529  | -0.0347 | 0.8169 |
|            | <i>PCDHGA5</i>  | A_33_P3395651 | 0.0162  | 0.9140 |
|            | <i>PCDHGA7</i>  | A_24_P308851  | -0.1599 | 0.2829 |
|            | <i>PCDHGA8</i>  | A_23_P390545  | -0.0471 | 0.7562 |
|            | <i>PCDHGA9</i>  | A_23_P364414  | -0.1811 | 0.2232 |
| cg21752383 | <i>PCDHGB1</i>  | A_33_P3417611 | -0.1632 | 0.2732 |
|            | <i>PCDHGB2</i>  | A_23_P411772  | 0.0651  | 0.6637 |
|            | <i>PCDHGB3</i>  | A_23_P395418  | 0.0888  | 0.5528 |
|            | <i>PCDHGB4</i>  | A_23_P359588  | 0.2179  | 0.1458 |
|            | <i>PCDHGB6</i>  | A_23_P415470  | -0.0781 | 0.6100 |
|            | <i>PCDHGB7</i>  | A_23_P370494  | 0.0751  | 0.6161 |
|            | <i>PCDHGC3</i>  | A_23_P218937  | 0.0934  | 0.5322 |
|            | <i>PCDHGC4</i>  | A_23_P303101  | 0.0500  | 0.7388 |
|            | <i>PCDHGC5</i>  | A_32_P32856   | -0.1001 | 0.5030 |
| cg24918705 | <i>PCDHB4</i>   | A_23_P81262   | -0.1207 | 0.4243 |
|            | <i>PCDHA1</i>   | A_33_P3403693 | -0.1162 | 0.4366 |
|            | <i>PCDHA10</i>  | A_33_P3281299 | -0.0452 | 0.7655 |
|            | <i>PCDHA11</i>  | A_33_P3351904 | -0.2163 | 0.1488 |
|            | <i>PCDHA12</i>  | A_33_P3329274 | -0.0532 | 0.7225 |
|            | <i>PCDHA13</i>  | A_33_P3210934 | -0.0488 | 0.7446 |
|            | <i>PCDHA2</i>   | A_33_P3391846 | -0.1619 | 0.2824 |
|            | <i>PCDHA3</i>   | A_33_P3332521 | -0.1732 | 0.2443 |
| cg25024993 | <i>PCDHA4</i>   | A_33_P3318002 | -0.1583 | 0.2879 |
|            | <i>PCDHA5</i>   | A_33_P3258546 | -0.1091 | 0.4705 |
|            | <i>PCDHA6</i>   | A_33_P3352867 | -0.0911 | 0.5424 |
|            | <i>PCDHA7</i>   | A_33_P3355608 | 0.1131  | 0.4491 |
|            | <i>PCDHA8</i>   | A_33_P3250695 | -0.1745 | 0.2408 |
|            | <i>PCDHA9</i>   | A_23_P323102  | -0.0381 | 0.8018 |
|            | <i>PCDHAC1</i>  | A_24_P191931  | -0.1204 | 0.4203 |
|            | <i>PCDHAC2</i>  | A_23_P218942  | -0.1808 | 0.2293 |

---
